# Supplementary material
Source: bioRxiv or medRxiv preprint supplement (https://www.biorxiv.org/highwire/filestream/33803/field_highwire_adjunct_files/0/100677-1.pdf)
Supplement: Supplementary file [file 100677-1.pdf]

619 Sinusoidal voltage protocols for rapid characterization  
620 of ion channel kinetics:  
621 Supplementary Material

622 Kylie A. Beattie<sup>1,2</sup>, Adam P. Hill<sup>3,4</sup>, Rémi Bardenet<sup>5</sup>, Yi Cui<sup>6</sup>,  
623 Jamie I. Vandenberg<sup>3,4</sup>, David J. Gavaghan<sup>1</sup>, Teun P. de Boer<sup>7</sup>, Gary R. Mirams<sup>1,8</sup>

623 March 12, 2017

624 **A Additional Methods**

625 This section contains further description of the methods that were used, with a particular focus on  
626 details of the Bayesian Inference scheme in Section A2. These sections do not feature in the Online  
627 Methods purely due to space constraints.

628 **A1 Protocol schematics**

629 Figures A1–A3 show plots of the voltage clamps that are used in the repeated activation step and  
630 activation kinetics protocols (Pr0–Pr2). The voltages and times of the steps are given in the Online  
631 Methods 4.2.

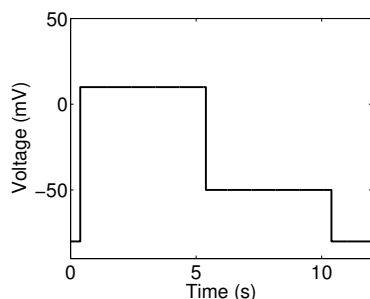

Figure A1: Repeated Activation Step Protocol (Pr0).

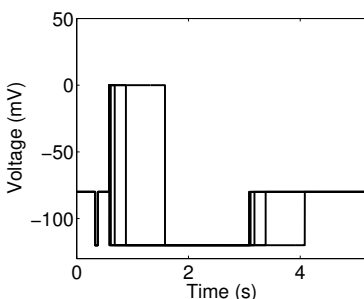

Figure A2: Activation Kinetics 1 Protocol (Pr1).

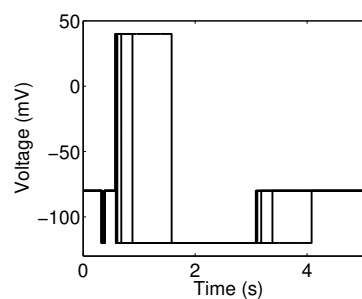

Figure A3: Activation Kinetics 2 Protocol (Pr2).

632 **A2 Bayesian Inference Scheme**

633 **A2.1 Conductance estimation to inform the prior**

634 Preliminary work revealed that using sine wave protocols alone often allowed kinetic parameters in  
635 the hERG model to be recovered, but there was potential for identifiability problems (or at least  
636 we encountered difficulties in finding a global optimum due to a rugged likelihood surface) when  
637 simultaneously fitting the conductance parameter and transition rate parameters  $P_1$  to  $P_8$  (although

638 previous work suggests all parameters are theoretically identifiable<sup>42</sup>). To add extra information  
639 on conductance, we incorporated a voltage-step to +40 mV followed by a step down to -120 mV,  
640 as described in the definition of the sine wave protocol in Section 4.2. The aim being to provoke  
641 a large current. We then fitted a single exponential through the slow time constant of the tail  
642 current exhibited during the -120 mV step (fitting was performed in the Clampfit software, using  
643 the Levenberg-Marquardt algorithm with a tolerance of  $10^{-6}$ ). We then extrapolated back to the  
644 point at which the voltage step to -120 mV was made, and used the extrapolated current value  
645 at this point to estimate a conductance at this time point (this extrapolation method is described  
646 in Vandenberg *et al.*<sup>2</sup>). The conductance we estimated was used as a lower bound for the prior  
647 distribution of the conductance, as we describe below.

## 648 A2.2 Prior

649 In this section we describe our prior assumptions on the values that each model parameter can take.  
650 The prior for the conductance  $G_{Kr}$  is assumed to be independent of the kinetic parameters, and to  
651 take a uniform distribution. As discussed above, the lower bound is formed by estimating a lower  
652 bound on the conductance value ‘directly’ from the experimental data; the upper bound is assumed  
653 to be 10 times the value of the lower bound.

654 The other model parameters are within transition rates of the form

$$k = A \exp(BV), \tag{A.1}$$

655 where  $V$  is voltage and  $A$  and  $B$  are model parameters ( $P_1$  to  $P_8$  for  $k_1$  to  $k_4$ , as shown in Figure 3).

656 For parameters of the form  $A$  we assumed that the prior distribution is uniform between  $10^{-7}$   
657 and  $1000 \text{ ms}^{-1}$ , again to cover (and extend beyond) the full physiological range expected with hERG  
658 channel gating.

659 We assume that the prior distributions for  $B$  parameters are uniform between  $10^{-7}$  and  $0.4$   
660  $\text{mV}^{-1}$ . The lower bound for this parameter was selected as the voltage-dependence becomes prac-  
661 tically redundant when  $B$  becomes small: when  $B = 10^{-7}$  the value of  $\exp(BV)$  will change by less  
662 than 0.0015% across the voltages we reach in this study. The upper value is beyond the physiolog-  
663 ically expected range.

664 We also impose a prior on the maximum rate of transition  $k$  between any states (maximum  
665 across the full voltage range in the protocol (that is from -120 to 58.25 mV)). If the maximum  
666 rate  $k$  is greater than  $1000 \text{ ms}^{-1}$ , or less than  $1.67 \times 10^{-5} \text{ ms}^{-1}$ , the pair of parameter values that  
667 give rise to this are assigned prior probability zero (strictly, this is equivalent to defining 2D prior  
668 on  $A$  and  $B$ , but is easier to describe here, and code, as an additional constraint): the lower bound  
669 is based on the assumption that a transition is not physiologically realistic if it occurs over a time  
670 scale slower than one minute; the upper bound was decided based on the prior for the individual  
671 parameters  $A$  and  $B$  in the transition rate expression and to prevent the transitions occurring over  
672 a time scale much faster than would be physiologically expected.

673 Note that our analysis is relatively insensitive to the precise form of the prior that is used as  
674 there are around 80,000 data points (8s of 10 kHz samples) in the likelihood product calculation  
675 of Equation (13), which is then also in a product with the prior in Equation (12). So, effectively,  
676 each of the 10,000 data points has the same impact as the prior does on the posterior. Given  
677 our likelihood is extremely peaked around its maximum (Figure 3C), we have observed no notable  
678 influence of the shape of the prior, as long as the maximum posterior density point is well away from  
679 the limits described above — which it has been in all cases. Note that the same concept means  
680 that, in our case, the “maximum likelihood estimate” (MLE — parameter set that maximizes

681 Equation (13)) would be practically indistinguishable from the “maximum a posteriori estimator”  
682 (MAP — parameter set that maximizes Equation (12)) even if we had a non-uniform prior.

### 683 **A2.3 Global minimization**

684 The Covariance Matrix Adaptation — Evolution Strategy (CMA-ES) algorithm was used to perform  
685 an initial exploration of the surface of the posterior density, and to identify parameter sets which  
686 allow the model to fit the experimental data well. The tolerance used is  $10^{-4}$  and all other settings  
687 are the defaults in MatLab implementation of CMA-ES v3.61, downloaded from [https://www.lri.](https://www.lri.fr/~hansen/cmaes.m)  
688 [fr/~hansen/cmaes.m](https://www.lri.fr/~hansen/cmaes.m). We imposed bounds based on the prior as we describe above in Section A2.2.

689 We run the CMA-ES algorithm from different starting points and continue to do so until we  
690 identify the same region of parameter space for optimal parameter sets for each experimental data  
691 trace when starting from many different starting points. In this way, we can be confident that we  
692 identify the same region of high likelihood consistently (not simply the first local minimum that is  
693 found), and we have more confidence that this corresponds to the globally optimal likelihood.

694 These initial starting points for the CMA-ES algorithm are sampled from within the prior  
695 defined for each parameter, described in section A2.2. To sample from the prior we simply select  
696 the voltage-dependent transition rate parameters (of the form  $B$  described above) uniformly from  
697 the defined range. The same approach is used to sample the conductance parameter.

698 For the parameters of the form  $A$  above we sample starting points in a logarithmic fashion across  
699 the range of the uniform prior. This approach helps to restrict the initial guesses of parameters to  
700 the region of measurable time scales we imposed by defining the maximum and minimum ranges on  
701 the overall transition rate, as described above. We also run a small selection of starting points with  
702 both  $A$  and  $B$  parameter values sampled uniformly from  $[10^{-7}, 0.1]$  (the range in which most existing  
703 model parameters lie), again to ensure we identify the global optimal solution to the optimization  
704 problem. We log-transform all parameters within CMA-ES to aid the optimization process by  
705 making all values similar orders of magnitude.

### 706 **A2.4 Markov Chain Monte Carlo parameter inference**

707 We use *Markov Chain Monte Carlo* (MCMC) methods to explore the posterior probability distri-  
708 bution. The approach we use is the *Metropolis-Hastings* algorithm. In this algorithm, candidate  
709 parameter sets are proposed from a *proposal distribution*  $q(\theta_{\text{cand}}|\theta_i)$  which depends only on the  
710 previously accepted parameter set  $\theta_i$ . We use a multivariate normal distribution as our proposal  
711 distribution. Any candidate parameter set  $\theta_{\text{cand}}$  is compared to the current parameter set  $\theta_i$  by  
712 calculating the ratio of the likelihood of the two parameter sets. The value of the ratio determines  
713 whether or not the proposed parameter set is accepted as part of the MCMC chain. If the can-  
714 didate parameter set has a greater posterior density value than the existing parameter set then  
715 it will be added to the Markov chain, that is  $\theta_{i+1} = \theta_{\text{cand}}$ . Otherwise, the parameter set may  
716 still be accepted with a probability equal to the ratio of likelihood/posterior density values. That  
717 is, a proposed parameter set generated from a multivariate normal distribution is accepted with  
718 probability

$$\alpha = \min \left\{ \frac{L(\theta_{\text{cand}}|\mathbf{y})}{L(\theta_i|\mathbf{y})}, 1 \right\}. \quad (\text{A.2})$$

719 Also note that if the proposed parameter set contains any parameters outside the range of the  
720 prior, or violates any of the conditions on the parameters that we have imposed, the parameter set  
721 is assigned an acceptance probability of 0 and immediately rejected and the previously accepted  
722 parameter set is again added to the Markov chain — that is,  $\theta_{i+1} = \theta_i$ .

723 In practice, we use a covariance matrix adaptive version of the Metropolis-Hastings Algorithm  
 724 which helps identify the directions in parameter space which have the highest likelihood values, the  
 725 algorithm is described in Haario *et al.*<sup>43</sup>. At each iteration of the algorithm, the covariance matrix  
 726 of the multivariate normal distribution is updated and a scalar value is also updated to define the  
 727 width of the distribution. We run our MCMC chains for 250,000 samples and discard the first  
 728 50,000 samples as ‘burn in’ (for an introduction to MCMC see Gilks *et al.*<sup>44</sup>).

## 729 B Details of Published hERG Channel Models

730 Figure 1A of the main text features simulations from 29 literature hERG or  $I_{Kr}$  models. In Table B1  
 731 we list these models, give references, and show the seven different structures that they feature in  
 732 Figure B4.

733 There are two models in this table that are not in Figure 1A: the Kiehn *et al.*<sup>45</sup> model as it  
 734 is defined only at certain voltages; and the Piper *et al.*<sup>46</sup> model as it does not easily fit into the  
 735 Hodgkin-Huxley/Markov model framework we used in our simulation code.

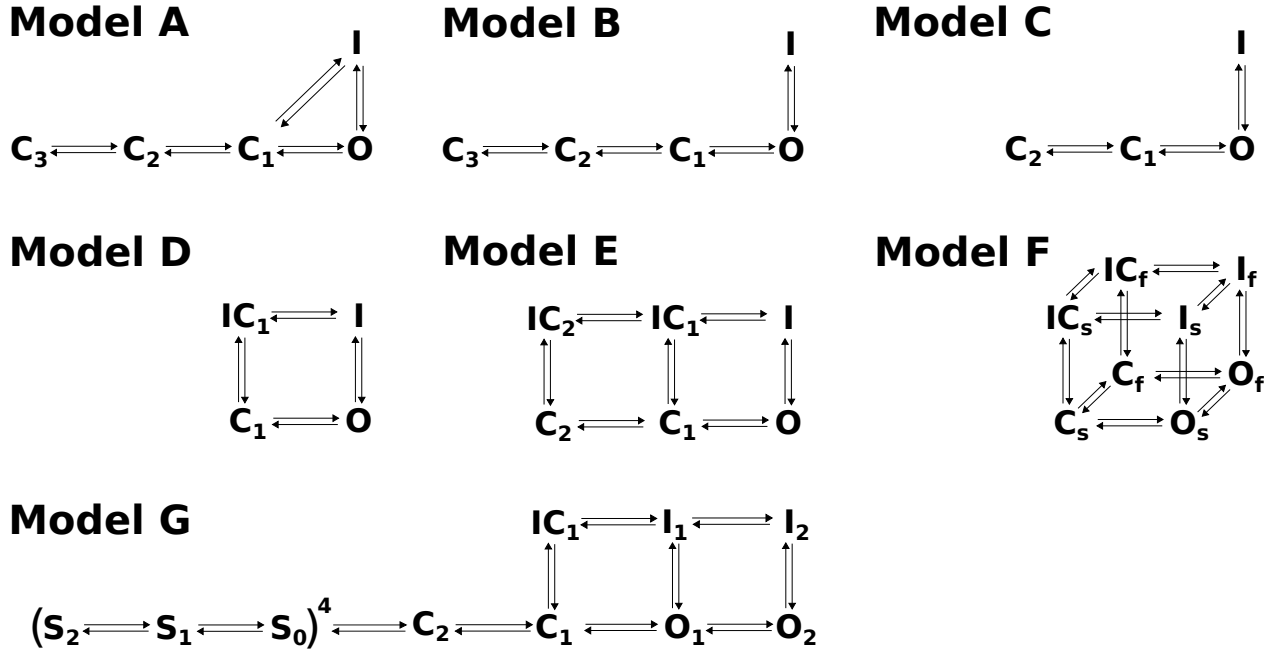

Figure B4: Different mathematical model structures for the literature models listed in Table B1. The model we use in the main text takes structure D as shown in Figure 3B.

Table B1: Table summarizing details of each published  $I_{Kr}$  model formulation, in chronological order. ‘# Params’ indicates the total number of free parameters (the number given includes a  $G_{Kr}$  parameter for the conductance). The *Model Type* is ‘HH’ for Hodgkin–Huxley models and ‘MM’ for Markov Models, or a hybrid of the two (MM/HH, which generally means a MM with some symmetry in transition rates).

| Model                                    | Model Type | # Params | Experimental Cell Type                                                        | Temperature   | Structure in Figure B4 |
|------------------------------------------|------------|----------|-------------------------------------------------------------------------------|---------------|------------------------|
| Zeng <i>et al.</i> <sup>30</sup>         | HH         | 11       | Guinea pig ventricular myocytes                                               | Physiological | D                      |
| Lindblad <i>et al.</i> <sup>47</sup>     | HH         | 11       | Rabbit SA, AV, atrial myocytes and rabbit and guinea pig ventricular myocytes | Physiological | D                      |
| Liu <i>et al.</i> <sup>48</sup>          | MM         | 11       | Ferret atrial myocytes                                                        | Room          | C                      |
| Wang <i>et al.</i> <sup>25</sup>         | MM         | 15       | <i>Xenopus</i> oocytes                                                        | Room          | B                      |
| Courtemanche <i>et al.</i> <sup>49</sup> | HH         | 10       | Human atrial myocytes                                                         | Physiological | D                      |
| Nygren <i>et al.</i> <sup>50</sup>       | HH         | 9        | Human atrial/rabbit atrial myocytes and <i>Xenopus</i> oocytes                | Physiological | D                      |
| Priebe & Beuckelmann <sup>51</sup>       | HH         | 9        | Human ventricular myocytes                                                    | Physiological | D                      |
| Kiehn <i>et al.</i> <sup>45</sup>        | MM         | 9*       | <i>Xenopus</i> oocytes                                                        | Room          | A                      |
| Winslow <i>et al.</i> <sup>52</sup>      | HH         | 7        | Guinea pig ventricular myocytes                                               | Physiological | D                      |
| Ramirez <i>et al.</i> <sup>53</sup>      | HH         | 13       | Canine atrial myocytes                                                        | Physiological | D                      |
| Zhang <i>et al.</i> <sup>54</sup>        | HH         | 15       | Rabbit sino-atrial node cells                                                 | Physiological | F                      |
| Clancy & Rudy <sup>55</sup>              | MM         | 14       | Guinea pig ventricular                                                        | Physiological | A                      |
| Lu <i>et al.</i> <sup>56</sup>           | MM         | 17       | Chinese Hamster Ovary (CHO)                                                   | Physiological | A                      |
| Mazhari <i>et al.</i> <sup>31</sup>      | MM         | 17       | Human Embryonic Kidney (HEK) 293                                              | Physiological | A                      |
| Fox <i>et al.</i> <sup>57</sup>          | HH         | 10       | Canine ventricular myocytes                                                   | Physiological | D                      |
| Kurata <i>et al.</i> <sup>58</sup>       | HH         | 18       | Rabbit sino-atrial node cells                                                 | Physiological | F                      |
| Oehmen <i>et al.</i> <sup>59</sup>       | MM         | 11       | Rabbit sino-atrial cells                                                      | Physiological | C                      |
| Matsuoka <i>et al.</i> <sup>60</sup>     | HH         | 23       | Rabbit pacemaker and guinea pig ventricular myocytes                          | Physiological | F                      |
| Piper <i>et al.</i> <sup>46</sup>        | MM/HH      | 43       | <i>Xenopus</i> oocytes                                                        | Room          | G                      |
| Seemann <i>et al.</i> <sup>61</sup>      | HH         | 7        | Human ventricular myocytes                                                    | Physiological | D                      |
| Hund & Rudy <sup>62</sup>                | HH         | 11       | Canine ventricular myocytes                                                   | Physiological | D                      |
| Shannon <i>et al.</i> <sup>63</sup>      | HH         | 11       | Rabbit ventricular myocytes                                                   | Physiological | D                      |
| Ten Tusscher <i>et al.</i> <sup>32</sup> | HH         | 13       | HEK 293/CHO/ <i>Xenopus</i> oocytes                                           | Physiological | D                      |
| Fink <i>et al.</i> <sup>64</sup>         | MM         | 15       | Human Embryonic Kidney (HEK) 293                                              | Physiological | B                      |
| Aslanidi <i>et al.</i> <sup>65</sup>     | HH         | 8        | Canine Purkinje cells                                                         | Physiological | D                      |
| Inada <i>et al.</i> <sup>66</sup>        | HH         | 20       | Rabbit atrio-ventricular node cells                                           | Physiological | F                      |
| Grandi <i>et al.</i> <sup>67</sup>       | HH         | 12       | Human ventricular myocytes                                                    | Physiological | D                      |
| O’Hara <i>et al.</i> <sup>68</sup>       | HH         | 19       | Human ventricular myocytes                                                    | Physiological | F                      |
| Severi <i>et al.</i> <sup>69</sup>       | HH         | 17       | Rabbit sino-atrial node cells                                                 | Physiological | F                      |
| Di Veroli <i>et al.</i> <sup>33</sup>    | MM/HH      | 13       | Chinese Hamster Ovary (CHO)                                                   | Room          | E                      |
| Di Veroli <i>et al.</i> <sup>33</sup>    | HH         | 17       | Human Embryonic Kidney (HEK293) expressing canine ERG                         | Physiological | D                      |

\* The transition rates of the Kiehn *et al.*<sup>45</sup> model are defined at specific voltages, so for this model there are 8 parameters (and 1 conductance parameter) for each voltage at which the model is defined.

## 736 C Synthetic Data Study to Assess Protocol Information Content

737 In order to verify that there was sufficient information within the sinusoidal voltage protocol to  
738 parameterize our model we performed a synthetic data study. The aim in such a study is to  
739 ascertain whether we can recover the parameters used in the simulation from a simulated data trace  
740 (with added noise in this case).

### 741 C1 Producing synthetic data

742 In order to produce synthetic data we simulated the mathematical model with the parameter values  
743 obtained when fitting to the experimental data trace. We scale the simulated trace by multiplying  
744 by this factor, so it becomes approximately the same magnitude (in nA) as the experimental trace.  
745 We estimated the typical level of noise from the experimental trace by calculating the standard  
746 deviation  $\sigma$  of the experimental current during the first 200 ms (where the current is around zero at  
747 the initial holding potential of  $-80$  mV). We then generate a synthetic data trace by adding normally  
748 distributed noise with a mean of zero and the standard deviation equal to the noise estimated from  
749 the experimental trace ( $\sim N(0, \sigma^2)$ ) to the conductance-scaled simulated trace.

750 The example we present here uses the experimental reference trace from cell 5, featured in much  
751 of the manuscript.

### 752 C2 Inferring parameters from synthetic data

753 We then attempt to infer parameters from this ‘synthetic data’ trace, using the CMA-ES algorithm  
754 followed by MCMC as described in Section 4.7. In Figure C5 we present probability density distri-  
755 butions obtained when using both synthetic and experimental traces. We are able to recover the  
756 original parameters underlying the synthetic trace with high accuracy.

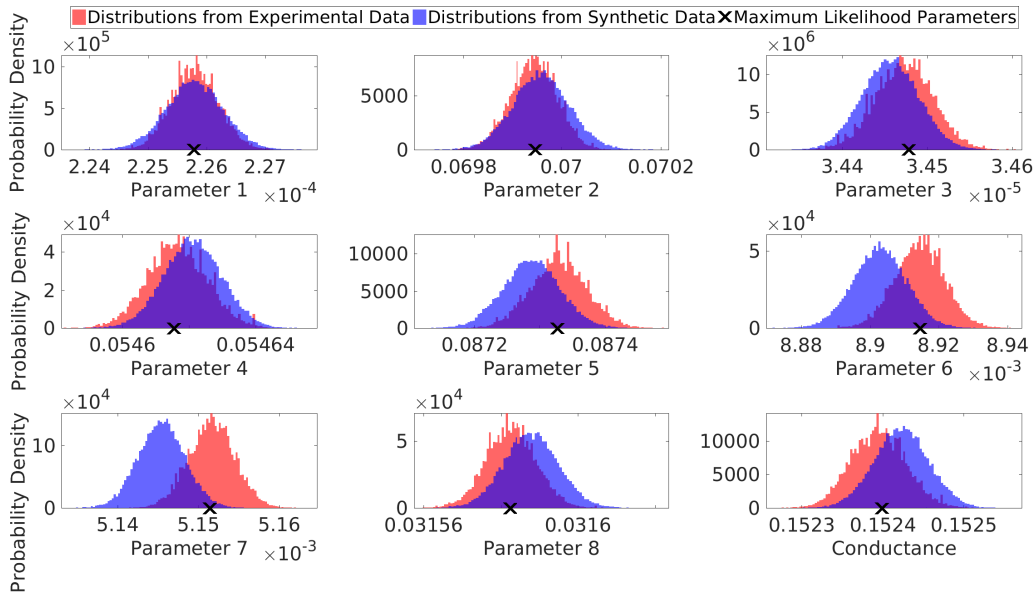

Figure C5: Probability density distributions for each parameter estimates from fitting to both experimental data (red) and simulated data (blue). Crosses indicate the parameter set with the maximum posterior density.

757 The synthetic data study provides us with confidence in the suitability of our protocol for  
758 accurately identifying parameters of the model presented in Figure 3B in the main text, and also  
759 that the parameter inference protocol(s) we are using are suitable for the task. We believe such an  
760 approach should always be used to test whether there is sufficient information in the experimental  
761 data being proposed for calibration of a mathematical model. The test should be performed twice:  
762 before conducting the experiment (with the pre-existing best guess at the parameters); and also after  
763 conducting the experiment (with the new maximum posterior density estimate of the parameters  
764 — as we illustrate in Figure C5).

## D Cell-Specific versus Literature Model Predictions

In Tables D2–D10 we compare the predictions given by each cell-specific model with a range of literature model predictions. We compare their ability to predict the full current traces for the validation protocols Pr3–6 discussed in the main text. Each table provides the mean (over each time point) square difference between an experimental current recording in one particular cell and its cell-specific model prediction under each of the validation protocols, and compares this with current predictions from a range of literature models. Equation (F.3) gives the formula that was used to calculate the error entries.

Note that we have to choose a conductance value,  $G_{K_r}$ , for the literature models.  $G_{K_r}$  is selected differently for each cell by minimizing the error metric for the predicted current trace under the action potential protocol (Pr6) for each model (a best-case scenario for each literature model). Our new cell-specific models’ conductances were fitted to the sine wave protocol (Pr7), along with the rest of their parameters. N.B. the literature model predictions are worse if we scale them to fit the sine wave; we considered this perhaps unjustified since they were developed never having seen such a protocol.

Despite literature models having their conductance scaled to minimize error in the Pr6 (action potential clamp) current prediction; only the Wang *et al.*<sup>25</sup> model for Cells #1, #3 and #4, and the Di Veroli *et al.*<sup>33</sup> model for Cell #9 perform better than our cell-specific models. The sine-wave fitted model outperforms all other literature models for all other cells.

Additionally, the Wang *et al.*<sup>25</sup> model gives better predictions for the deactivation protocol current for some cells; and for the inactivation protocol for Cell #9. The Di Veroli *et al.*<sup>33</sup> model gives better predictions for the inactivation protocol for Cells #5 and #9; and the deactivation protocol for Cell #6.

Table D2: Table quantifying square root of mean square difference (units nA) between experimental current traces and simulation predictions for the validation protocols shown in Figures 4 and 5 for Cell #1. Here the color scale is set so that  represents zero error and  represents the highest error for each protocol/column.

| Model                                    | Sine Wave (Pr7) | AP (Pr6) | Steady Act. (Pr3) | Deact. (Pr4) | Inact. (Pr5) |
|------------------------------------------|-----------------|----------|-------------------|--------------|--------------|
| New model for Cell #1                    | 0.0268          | 0.0757   | 0.0745            | 0.2115       | 0.1312       |
| Wang <i>et al.</i> <sup>25</sup>         | 0.1196          | 0.0746   | 0.2079            | 0.2574       | 0.1543       |
| Di Veroli <i>et al.</i> <sup>33</sup>    | 0.1406          | 0.0910   | 0.2097            | 0.3005       | 0.1706       |
| Mazhari <i>et al.</i> <sup>31</sup>      | 0.1213          | 0.0885   | 0.1962            | 0.3171       | 0.1619       |
| Ten Tusscher <i>et al.</i> <sup>32</sup> | 0.1827          | 0.1079   | 0.2563            | 0.3335       | 0.2265       |
| Zeng <i>et al.</i> <sup>30</sup>         | 0.1928          | 0.1381   | 0.2961            | 0.3617       | 0.2275       |



Table D3: Table quantifying square root of mean square difference (units nA) between experimental current traces and simulation predictions for the validation protocols shown in Figures 4 and 5 for Cell #2. Here the color scale is set so that  represents zero error and  represents the highest error for each protocol/column.

| Model                                    | Sine Wave (Pr7) | AP (Pr6) | Steady Act. (Pr3) | Deact. (Pr4) | Inact. (Pr5) |
|------------------------------------------|-----------------|----------|-------------------|--------------|--------------|
| New model for Cell #2                    | 0.0262          | 0.0549   | 0.0481            | 0.1421       | 0.0478       |
| Wang <i>et al.</i> <sup>25</sup>         | 0.0923          | 0.0732   | 0.1081            | 0.1075       | 0.0818       |
| Di Veroli <i>et al.</i> <sup>33</sup>    | 0.0687          | 0.0564   | 0.0859            | 0.1427       | 0.0655       |
| Mazhari <i>et al.</i> <sup>31</sup>      | 0.0618          | 0.0664   | 0.0882            | 0.1793       | 0.0629       |
| Ten Tusscher <i>et al.</i> <sup>32</sup> | 0.1280          | 0.1159   | 0.1460            | 0.1902       | 0.1518       |
| Zeng <i>et al.</i> <sup>30</sup>         | 0.1356          | 0.1395   | 0.1835            | 0.2190       | 0.1497       |

Table D4: Table quantifying square root of mean square difference (units nA) between experimental current traces and simulation predictions for the validation protocols shown in Figures 4 and 5 for Cell #3. Here the color scale is set so that  represents zero error and  represents the highest error for each protocol/column.

| Model                                    | Sine Wave (Pr7) | AP (Pr6) | Steady Act. (Pr3) | Deact. (Pr4) | Inact. (Pr5) |
|------------------------------------------|-----------------|----------|-------------------|--------------|--------------|
| New model for Cell #3                    | 0.0348          | 0.0997   | 0.0917            | 0.1320       | 0.1106       |
| Wang <i>et al.</i> <sup>25</sup>         | 0.1015          | 0.0900   | 0.1071            | 0.1030       | 0.1178       |
| Di Veroli <i>et al.</i> <sup>33</sup>    | 0.1365          | 0.1298   | 0.1639            | 0.1660       | 0.1502       |
| Mazhari <i>et al.</i> <sup>31</sup>      | 0.1167          | 0.1263   | 0.1404            | 0.1885       | 0.1599       |
| Ten Tusscher <i>et al.</i> <sup>32</sup> | 0.1833          | 0.1337   | 0.1603            | 0.1929       | 0.1953       |
| Zeng <i>et al.</i> <sup>30</sup>         | 0.2024          | 0.1826   | 0.2123            | 0.2272       | 0.1971       |

Table D5: Table quantifying square root of mean square difference (units nA) between experimental current traces and simulation predictions for the validation protocols shown in Figures 4 and 5 for Cell #4. Here the color scale is set so that  represents zero error and  represents the highest error for each protocol/column.

| Model                                    | Sine Wave (Pr7) | AP (Pr6) | Steady Act. (Pr3) | Deact. (Pr4) | Inact. (Pr5) |
|------------------------------------------|-----------------|----------|-------------------|--------------|--------------|
| New model for Cell #4                    | 0.0346          | 0.0649   | 0.0931            | 0.1337       | 0.0864       |
| Wang <i>et al.</i> <sup>25</sup>         | 0.0962          | 0.0624   | 0.0804            | 0.0736       | 0.0928       |
| Di Veroli <i>et al.</i> <sup>33</sup>    | 0.0713          | 0.0871   | 0.1381            | 0.1462       | 0.1028       |
| Mazhari <i>et al.</i> <sup>31</sup>      | 0.0744          | 0.0992   | 0.1098            | 0.1828       | 0.1249       |
| Ten Tusscher <i>et al.</i> <sup>32</sup> | 0.1374          | 0.1350   | 0.1268            | 0.1771       | 0.1663       |
| Zeng <i>et al.</i> <sup>30</sup>         | 0.1545          | 0.1867   | 0.1939            | 0.2194       | 0.1713       |

Table D6: Table quantifying square root of mean square difference (units nA) between experimental current traces and simulation predictions for the validation protocols shown in Figures 4 and 5 for Cell #5. Here the color scale is set so that  represents zero error and  represents the highest error for each protocol/column.

| Model                                    | Sine Wave (Pr7) | AP (Pr6) | Steady Act. (Pr3) | Deact. (Pr4) | Inact. (Pr5) |
|------------------------------------------|-----------------|----------|-------------------|--------------|--------------|
| New model for Cell #5                    | 0.0338          | 0.1003   | 0.0964            | 0.2788       | 0.5713       |
| Wang <i>et al.</i> <sup>25</sup>         | 0.1409          | 0.1185   | 0.2236            | 0.2856       | 0.5715       |
| Di Veroli <i>et al.</i> <sup>33</sup>    | 0.1498          | 0.1648   | 0.2086            | 0.3864       | 0.5659       |
| Mazhari <i>et al.</i> <sup>31</sup>      | 0.1400          | 0.1760   | 0.1982            | 0.4443       | 0.5726       |
| Ten Tusscher <i>et al.</i> <sup>32</sup> | 0.2643          | 0.2453   | 0.3169            | 0.4653       | 0.6482       |
| Zeng <i>et al.</i> <sup>30</sup>         | 0.2845          | 0.3116   | 0.4001            | 0.5245       | 0.6262       |

Table D7: Table quantifying square root of mean square difference (units nA) between experimental current traces and simulation predictions for the validation protocols shown in Figures 4 and 5 for Cell #6. Here the color scale is set so that  represents zero error and  represents the highest error for each protocol/column.

| Model                                    | Sine Wave (Pr7) | AP (Pr6) | Steady Act. (Pr3) | Deact. (Pr4) | Inact. (Pr5) |
|------------------------------------------|-----------------|----------|-------------------|--------------|--------------|
| New model for Cell #6                    | 0.0149          | 0.0419   | 0.0482            | 0.0883       | 0.0443       |
| Wang <i>et al.</i> <sup>25</sup>         | 0.0396          | 0.0503   | 0.0537            | 0.0412       | 0.0528       |
| Di Veroli <i>et al.</i> <sup>33</sup>    | 0.0362          | 0.0569   | 0.0596            | 0.0794       | 0.0458       |
| Mazhari <i>et al.</i> <sup>31</sup>      | 0.0511          | 0.0621   | 0.0603            | 0.1048       | 0.0560       |
| Ten Tusscher <i>et al.</i> <sup>32</sup> | 0.0788          | 0.0844   | 0.0776            | 0.1041       | 0.1014       |
| Zeng <i>et al.</i> <sup>30</sup>         | 0.0867          | 0.1101   | 0.1051            | 0.1255       | 0.0988       |

Table D8: Table quantifying square root of mean square difference (units nA) between experimental current traces and simulation predictions for the validation protocols shown in Figures 4 and 5 for Cell #7. Here the color scale is set so that  represents zero error and  represents the highest error for each protocol/column.

| Model                                    | Sine Wave (Pr7) | AP (Pr6) | Steady Act. (Pr3) | Deact. (Pr4) | Inact. (Pr5) |
|------------------------------------------|-----------------|----------|-------------------|--------------|--------------|
| New model for Cell #7                    | 0.0825          | 0.1343   | 0.2060            | 0.3167       | 0.1239       |
| Wang <i>et al.</i> <sup>25</sup>         | 0.1914          | 0.2176   | 0.2506            | 0.2358       | 0.2726       |
| Di Veroli <i>et al.</i> <sup>33</sup>    | 0.1994          | 0.2654   | 0.2827            | 0.4101       | 0.2605       |
| Mazhari <i>et al.</i> <sup>31</sup>      | 0.2361          | 0.2987   | 0.2597            | 0.5102       | 0.2637       |
| Ten Tusscher <i>et al.</i> <sup>32</sup> | 0.3966          | 0.4124   | 0.4205            | 0.5287       | 0.5326       |
| Zeng <i>et al.</i> <sup>30</sup>         | 0.4147          | 0.5013   | 0.5597            | 0.6246       | 0.5357       |

Table D9: Table quantifying square root of mean square difference (units nA) between experimental current traces and simulation predictions for the validation protocols shown in Figures 4 and 5 for Cell #8. Here the color scale is set so that  represents zero error and  represents the highest error for each protocol/column.

| Model                                    | Sine Wave (Pr7) | AP (Pr6) | Steady Act. (Pr3) | Deact. (Pr4) | Inact. (Pr5) |
|------------------------------------------|-----------------|----------|-------------------|--------------|--------------|
| New model for Cell #8                    | 0.0426          | 0.1331   | 0.1302            | 0.1796       | 0.2222       |
| Wang <i>et al.</i> <sup>25</sup>         | 0.1043          | 0.1367   | 0.2036            | 0.2100       | 0.2491       |
| Di Veroli <i>et al.</i> <sup>33</sup>    | 0.1053          | 0.1545   | 0.1828            | 0.2656       | 0.2538       |
| Mazhari <i>et al.</i> <sup>31</sup>      | 0.1071          | 0.1621   | 0.1860            | 0.3058       | 0.2528       |
| Ten Tusscher <i>et al.</i> <sup>32</sup> | 0.1839          | 0.1957   | 0.2624            | 0.3248       | 0.3334       |
| Zeng <i>et al.</i> <sup>30</sup>         | 0.1902          | 0.2305   | 0.3122            | 0.3641       | 0.3347       |

Table D10: Table quantifying square root of mean square difference (units nA) between experimental current traces and simulation predictions for the validation protocols shown in Figures 4 and 5 for Cell #9. Here the color scale is set so that  represents zero error and  represents the highest error for each protocol/column.

| Model                                    | Sine Wave (Pr7) | AP (Pr6) | Steady Act. (Pr3) | Deact. (Pr4) | Inact. (Pr5) |
|------------------------------------------|-----------------|----------|-------------------|--------------|--------------|
| New model for Cell #9                    | 0.0243          | 0.1478   | 0.1109            | 0.1806       | 0.2183       |
| Wang <i>et al.</i> <sup>25</sup>         | 0.0507          | 0.1493   | 0.1277            | 0.1755       | 0.2181       |
| Di Veroli <i>et al.</i> <sup>33</sup>    | 0.0474          | 0.1474   | 0.1153            | 0.1830       | 0.2164       |
| Mazhari <i>et al.</i> <sup>31</sup>      | 0.0408          | 0.1482   | 0.1176            | 0.1917       | 0.2163       |
| Ten Tusscher <i>et al.</i> <sup>32</sup> | 0.0773          | 0.1547   | 0.1443            | 0.1961       | 0.2246       |
| Zeng <i>et al.</i> <sup>30</sup>         | 0.0820          | 0.1606   | 0.1589            | 0.2060       | 0.2253       |

788 **E Additional Peak Current-Voltage Relationship Predictions**

789 Here we show the remainder of the predictions of the current-voltage relationships for the validation  
 790 data of cell 5 that were not included in the main text (the results of Pr1 and Pr2). Figure E6 shows  
 791 the summary curves for Pr1 (voltage clamp shown in Figure A2) and Pr2 (voltage clamp shown in  
 792 Figure A3).

793 Traditionally these peak current curves would be plotted by normalizing to the peak current  
 794 recorded in each activation kinetics protocol. However, as we have used a shorter version of the  
 795 activation kinetics protocol, we do not expect that the channel would be fully open at the longest  
 796 duration test step in Pr1 and Pr2. We have therefore instead normalized the curves using the peak  
 797 current during the initial deactivation step in the sine wave protocol (around 1.6 seconds) where we  
 798 expect the channel to be maximally open.

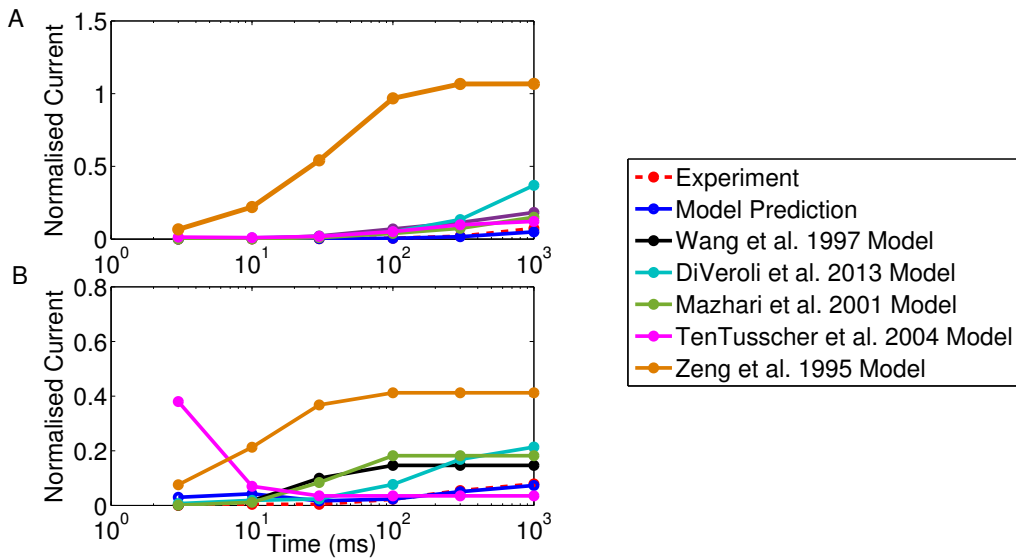

Figure E6: Predictions of peak current-voltage relationship derived from experiment and model predictions in response to; A) Activation Kinetics Pr1, B) Activation Kinetics Pr2, with comparison of our model prediction with predictions from existing literature models. Currents have been normalized to the peak current in the initial deactivation step in the sine wave protocol (around 1.6 seconds) as we do not expect the channel to be fully open at the longest  $T_{step}$  in these activation kinetics protocols.

## F Comparing Cell-Specific with Average Model

In addition to creating cell specific models as described so far we also created an averaged model by first normalizing each experimental trace to one reference trace (so that each trace was given equal weight in the averaging regardless of the conductance of the channel) and then summing and averaging the current value at each time point along the protocol.

The parameter values obtained when calibrating each cell-specific and averaged model are shown in Table F11. These values correspond to the parameter sets with maximum posterior density identified in the MCMC chain. The full posterior density distributions for each parameter for each of the 9 cells are shown in Figure F7.

Table F11: Table of parameter values at the maximum posterior density for each cell-specific model, and the model fitted to averaged data. Here the model parameter numberings correspond to those detailed in Figure 3B, and  $G_{Kr}$  represents the conductance value fitted for each model. \*Note that the conductance fitted for the ‘Averaged’ model reflects mainly the conductance for the reference experimental trace (used for scaling all other traces before averaging), and should not be considered the ‘average’ conductance, hence its omission from Figure 6A.

|          | $P_1$                   | $P_2$  | $P_3$                   | $P_4$  | $P_5$  | $P_6$  | $P_7$  | $P_8$  | $G_{Kr}$ |
|----------|-------------------------|--------|-------------------------|--------|--------|--------|--------|--------|----------|
| Cell #1  | $1.9742 \times 10^{-4}$ | 0.0594 | $7.1664 \times 10^{-5}$ | 0.0493 | 0.1048 | 0.0139 | 0.0038 | 0.0360 | 0.1350   |
| Cell #2  | $3.2387 \times 10^{-4}$ | 0.0653 | $7.8183 \times 10^{-5}$ | 0.0497 | 0.0805 | 0.0025 | 0.0049 | 0.0324 | 0.0902   |
| Cell #3  | $4.7883 \times 10^{-4}$ | 0.0661 | $5.1621 \times 10^{-5}$ | 0.0523 | 0.1375 | 0.0094 | 0.0039 | 0.0375 | 0.1011   |
| Cell #4  | $6.7417 \times 10^{-4}$ | 0.0563 | $5.8605 \times 10^{-5}$ | 0.0516 | 0.0893 | 0.0057 | 0.0059 | 0.0324 | 0.0743   |
| Cell #5  | $2.2578 \times 10^{-4}$ | 0.0699 | $3.4477 \times 10^{-5}$ | 0.0546 | 0.0873 | 0.0089 | 0.0052 | 0.0316 | 0.1524   |
| Cell #6  | $6.1015 \times 10^{-4}$ | 0.0662 | $1.2729 \times 10^{-4}$ | 0.0380 | 0.0810 | 0.0165 | 0.0092 | 0.0253 | 0.0218   |
| Cell #7  | $5.5188 \times 10^{-4}$ | 0.0477 | $6.6263 \times 10^{-5}$ | 0.0457 | 0.0628 | 0.0087 | 0.0054 | 0.0317 | 0.1555   |
| Cell #8  | $3.1062 \times 10^{-4}$ | 0.0485 | $5.0455 \times 10^{-5}$ | 0.0491 | 0.0722 | 0.0063 | 0.0060 | 0.0328 | 0.0983   |
| Cell #9  | $5.5916 \times 10^{-4}$ | 0.0435 | $1.2377 \times 10^{-4}$ | 0.0444 | 0.0658 | 0.0028 | 0.0036 | 0.0343 | 0.0514   |
| Averaged | $4.0177 \times 10^{-4}$ | 0.0578 | $6.5137 \times 10^{-5}$ | 0.0487 | 0.0807 | 0.0068 | 0.0052 | 0.0334 | 0.0673*  |

To quantitatively compare the average model predictions and the cell-specific model predictions shown in Figure 6B of the main text we calculated the mean square difference at each point between the average model and the cell-specific models for each cell when predicting the full current trace in response to the steady-state activation protocol. We also repeated this for the deactivation and inactivation protocols and the action potential protocol shown in Figures 4 and 5. The differences for each cell are shown in Table F12 with a comparison between the experimental result and the average model predictions with the cell-specific predictions.

We note that we have ordered the cells in this table (as in Figure 6) according to the percentage change in leak resistance between performing the vehicle and dofetilide repeats of the sine wave voltage protocol used to construct the model. This ordering acts as an estimated ranking for the quality of each recording. The benefit of a cell-specific approach occurs when using the highest quality data for both model construction and validation. We should note that even though in cells #4 and #6 the average model provides the better prediction of the steady-state activation peak current-voltage relationship than the cell-specific model, the cell-specific models are still providing very good predictions in these cases, it is just that the experimental behavior is more like the average model behavior for these cells. We also note that for six out of the nine cells, the cell-specific model provides a better prediction of the current response to the action potential protocol than the average model, however, in the cases where the cell-specific model is worse the difference is only a small amount.

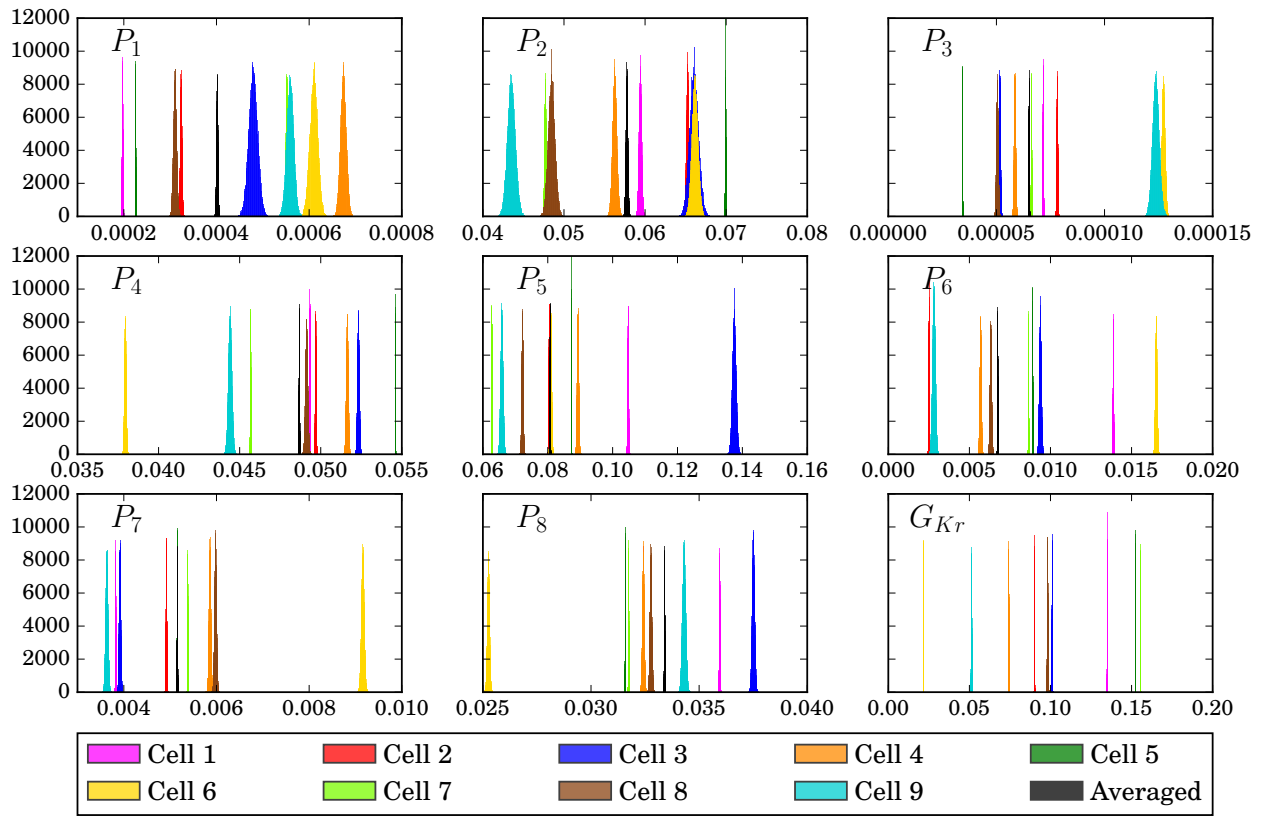

Figure F7: Distributions for each parameter for each of the 9 cell-specific models and the averaged data model. To aid comparison these are all histograms with 100 bars (plotting probability distributions here leads to very different maxima, obscuring the spread information), and so the y-axis is in arbitrary units related to the number of samples. We see that the parameter values tend to be given distinct distributions and so we would consider most of them to be ‘significantly different’.

We use a measure of

$$\text{error} = \left( \frac{1}{T} \sum_{t=1}^T (\text{simulated current at time step } t - \text{experimental current at time step } t)^2 \right)^{\frac{1}{2}}, \quad (\text{F.3})$$

828 to evaluate the error in model predictions for individual cells (using the whole current traces, apart  
829 from removing regions in the sine wave protocol with capacitive spikes as explained in Online  
830 Methods 4.7.1).

Table F12: Table showing the error measure defined by equation F.3 between cell-specific or average models and the experimental current recording for fit (sine wave Pr7) and predictions with validation protocols (all other columns). Cells are ordered in ascending order according to the percentage change in leak resistance  $R_{leak}$ . Here the color scale is set so that within each pair of columns   represents lowest error and   represents the highest error for each protocol/pair of columns. Note that the cells with larger currents will show larger errors, but the left column cell-specific predictions tend to perform better than the average model, particularly for cells where the average model gives a relatively large error.

| Cell # | $\Delta R_{leak}$ (%) | Sine Wave (Pr 7) |         | APs (Pr 6) |        | Steady Act. (Pr 3) |        | Deact. (Pr 4) |        | Inact. (Pr 5) |        |
|--------|-----------------------|------------------|---------|------------|--------|--------------------|--------|---------------|--------|---------------|--------|
|        |                       | Specific         | Average | Spec.      | Aver.  | Spec.              | Aver.  | Spec.         | Aver.  | Spec.         | Aver.  |
| 1      | 0.0                   | 0.0268           | 0.0650  | 0.0757     | 0.1195 | 0.0745             | 0.1369 | 0.2115        | 0.2334 | 0.1312        | 0.1250 |
| 2      | 7.7                   | 0.0262           | 0.0401  | 0.0549     | 0.0516 | 0.0481             | 0.0490 | 0.1421        | 0.1249 | 0.0478        | 0.0489 |
| 3      | 12.5                  | 0.0348           | 0.0609  | 0.0997     | 0.1403 | 0.0917             | 0.1489 | 0.1320        | 0.1317 | 0.1106        | 0.1600 |
| 4      | 16.7                  | 0.0346           | 0.0497  | 0.0649     | 0.0690 | 0.0931             | 0.0797 | 0.1337        | 0.1301 | 0.0864        | 0.0959 |
| 5      | 20.0                  | 0.0338           | 0.0374  | 0.1003     | 0.1149 | 0.0964             | 0.1274 | 0.2788        | 0.3358 | 0.5713        | 0.5668 |
| 6      | 28.6                  | 0.0149           | 0.0335  | 0.0419     | 0.0401 | 0.0482             | 0.0372 | 0.0883        | 0.0739 | 0.0443        | 0.0419 |
| 7      | 32.5                  | 0.0825           | 0.1073  | 0.1343     | 0.1635 | 0.2060             | 0.1772 | 0.3167        | 0.3595 | 0.1239        | 0.1398 |
| 8      | 42.9                  | 0.0426           | 0.0514  | 0.1331     | 0.1356 | 0.1302             | 0.1494 | 0.1796        | 0.2345 | 0.2222        | 0.2233 |
| 9      | 58.3                  | 0.0243           | 0.0266  | 0.1478     | 0.1472 | 0.1109             | 0.1068 | 0.1806        | 0.1766 | 0.2183        | 0.2174 |

831 For predictions of the action potential protocol currents, Table F12 demonstrates that the cell-  
832 specific modeling approach yields predictions that are very close to or better than the average model.  
833 Additionally, for the predictions of the steady-state activation protocol the cell-specific approach  
834 generally yields very good and more accurate (for 4/5) predictions of validation data when the  
835 highest quality data is used (cells #1–5). This benefit is absent when lower quality experimental  
836 data is used where the average model provides very similar, but slightly better, predictions (cells  
837 #6–9).

838 We also compare cell-specific and average predictions for each of the 9 cells for the deactivation,  
839 recovery from inactivation and instantaneous inactivation time constants as were shown for one  
840 cell in Figure 4. We show this comparison for each cell in Figure F8 and F9 for 8/9 cells and in  
841 Figure F10 for all cells. Cell #6 was omitted in the first two plots because this cell had a particularly  
842 low current and it was difficult to accurately fit exponential curves to the experimental data for  
843 this cell. We also note that we have not plotted the time constant values for  $-90$  mV in Figures F8  
844 & F9 for the same reason; we could not confidently fit an exponential decay curve to determine an  
845 accurate time constant value for this voltage step.

846 We see in Figures F8–F10 that the same observations that were made for the results shown in  
847 Figure 6 generally hold: for lower cell numbers #1–5, we see enhanced predictions of the experi-  
848 mental time constants from the cell-specific model rather than the averaged model. i.e predictions

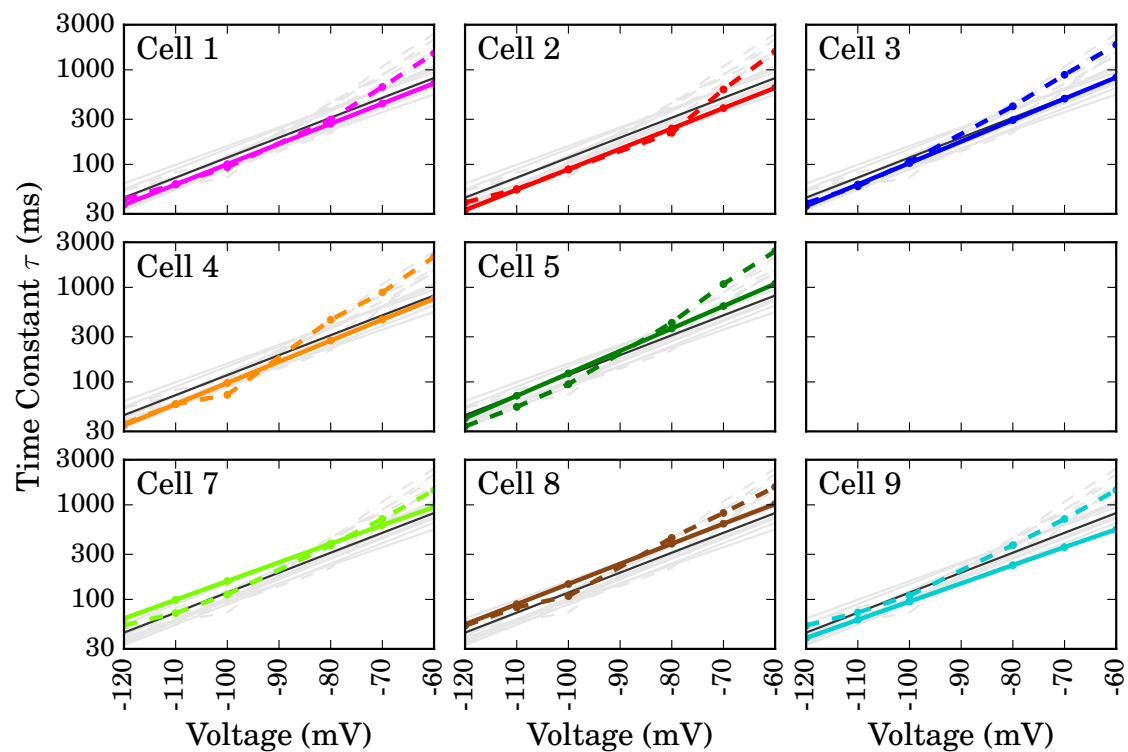

Figure F8: Cell-specific model predictions of time constant/voltage relationships for deactivation (Pr5). Each plot represents a different cell, with cell-specific model prediction depicted by the bold line, and the dashed line showing the cell's experimental data. Black lines on each plot represents the average model prediction. Cells are ordered as in Table F12.



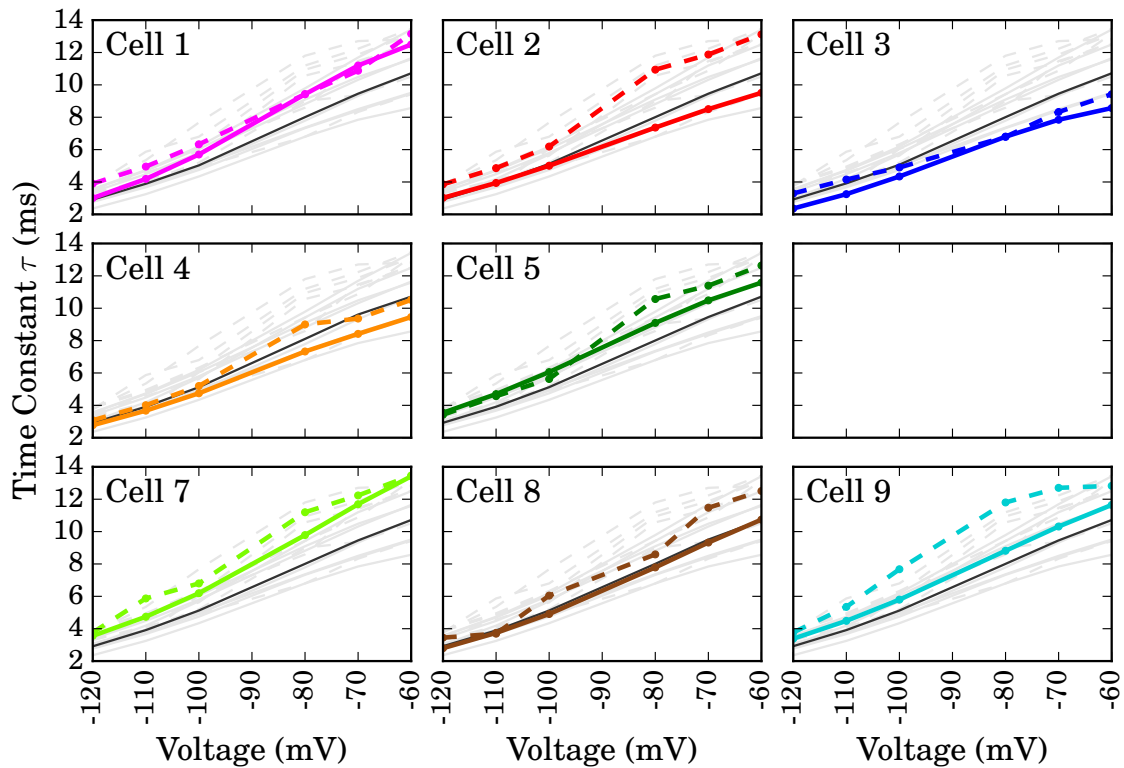

Figure F9: Cell-specific model predictions of time constant/voltage relationships for recovery from inactivation in Pr5. Each plot represents a different cell, with cell-specific model prediction depicted by the bold line, and the dashed line showing the cell's experimental data. Black lines on each plot represents the average model prediction. Cells are ordered as in Table F12.

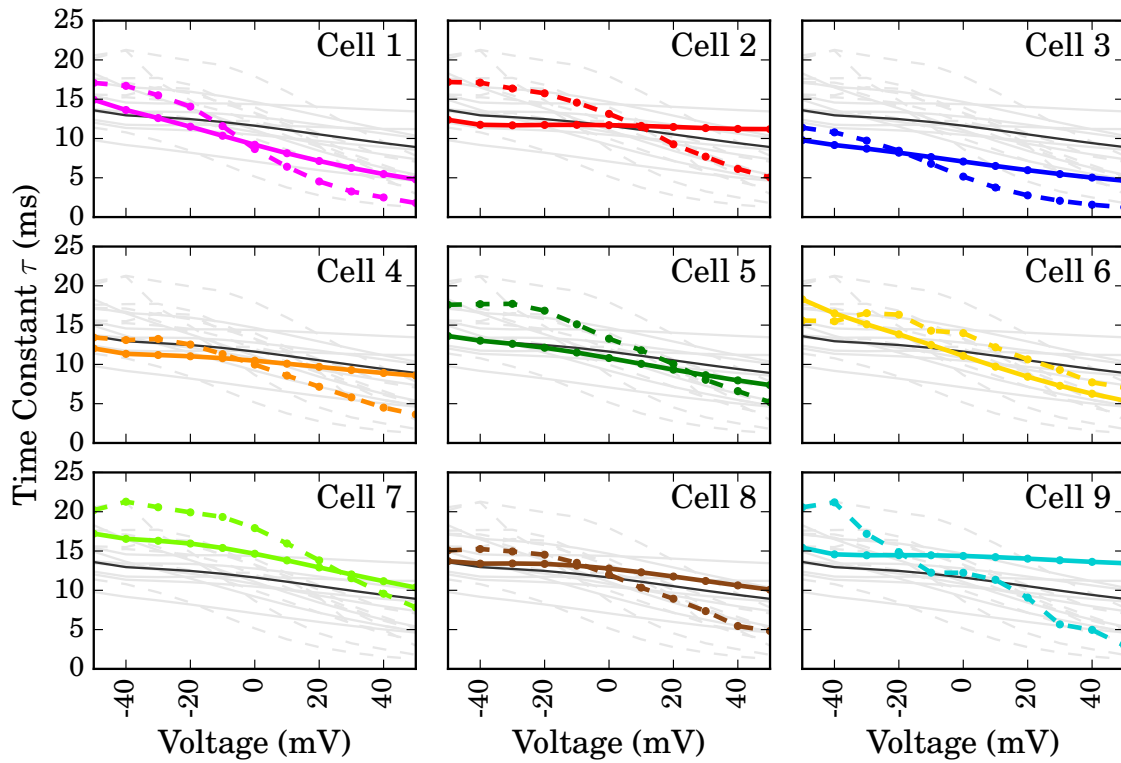

Figure F10: Cell-specific model predictions of time constant/voltage relationships for instantaneous inactivation (Pr4). Each plot represents a different cell, with cell-specific model prediction depicted by the bold line, and the dashed line showing the cell's experimental data. Black lines on each plot represents the average model prediction. Cells are ordered as in Table F12.

849 are better in the cells with lower percentage changes in leak current resistance, which correspond  
850 to better quality data.

## 851 References

- 852 2. Vandenberg, J. *et al.* hERG K<sup>+</sup> channels: Structure, function, and clinical significance. *Phys-*  
853 *iological Reviews* **92**, 1393–1478 (2012).
- 854 25. Wang, S., Liu, S., Morales, M., Strauss, H. & Rasmusson, R. A quantitative analysis of the  
855 activation and inactivation kinetics of HERG expressed in *Xenopus* oocytes. *The Journal of*  
856 *Physiology* **502**, 45–60 (1997).
- 857 30. Zeng, J., Laurita, K. R., Rosenbaum, D. S. & Rudy, Y. Two components of the delayed rectifier  
858 K<sup>+</sup> current in ventricular myocytes of the guinea pig type theoretical formulation and their  
859 role in repolarization. *Circulation Research* **77**, 140–152 (1995).
- 860 31. Mazhari, R., Greenstein, J., Winslow, R., Marbán, E. & Nuss, H. Molecular interactions be-  
861 tween two Long-QT syndrome gene products, HERG and KCNE2, rationalized by in vitro and  
862 in silico analysis. *Circulation Research* **89**, 33–38 (2001).
- 863 32. Ten Tusscher, K., Noble, D., Noble, P. & Panfilov, A. A model for human ventricular tissue.  
864 *American Journal of Physiology-Heart and Circulatory Physiology* **286**, H1573–H1589 (2004).
- 865 33. Di Veroli, G., Davies, M., Zhang, H., Abi-Gerges, N. & Boyett, M. High-throughput screening  
866 of drug-binding dynamics to HERG improves early drug safety assessment. *American Journal*  
867 *of Physiology-Heart and Circulatory Physiology* **304**, H104–H117 (2013).
- 868 42. Walch, O. J. & Eisenberg, M. C. Parameter identifiability and identifiable combinations in  
869 generalized Hodgkin–Huxley models. *Neurocomputing* **199**, 137–143 (2016).
- 870 43. Haario, H., Saksman, E. & Tamminen, J. An Adaptive Metropolis Algorithm. *Bernoulli*, 223–  
871 242 (2001).
- 872 44. Gilks, W. R., Richardson, S. & Spiegelhalter, D. J. *Markov chain Monte Carlo in practice*  
873 (London: Chapman and Hall, 1996).
- 874 45. Kiehn, J., Lacerda, A. & Brown, A. Pathways of HERG inactivation. *American Journal of*  
875 *Physiology-Heart and Circulatory Physiology* **277**, H199–H210 (1999).
- 876 46. Piper, D., Varghese, A., Sanguinetti, M. & Tristani-Firouzi, M. Gating currents associated  
877 with intramembrane charge displacement in HERG potassium channels. *Proceedings of the*  
878 *National Academy of Sciences* **100**, 10534 (2003).
- 879 47. Lindblad, D., Murphey, C., Clark, J. & Giles, W. A model of the action potential and under-  
880 lying membrane currents in a rabbit atrial cell. *American Journal of Physiology* **271**, H1666–  
881 H1696 (1996).
- 882 48. Liu, S., Rasmusson, R., Campbell, D., Wang, S. & Strauss, H. Activation and inactivation  
883 kinetics of an E-4031-sensitive current from single ferret atrial myocytes. *Biophysical Journal*  
884 **70**, 2704–2715 (1996).
- 885 49. Courtemanche, M., Ramirez, R. & Nattel, S. Ionic mechanisms underlying human atrial action  
886 potential properties: Insights from a mathematical model. *American Journal of Physiology-*  
887 *Heart and Circulatory Physiology* **275**, H301–H321 (1998).
- 888 50. Nygren, A. *et al.* Mathematical model of an adult human atrial cell the role of K<sup>+</sup> currents in  
889 repolarization. *Circulation Research* **82**, 63–81 (1998).

- 890 51. Priebe, L. & Beuckelmann, D. J. Simulation study of cellular electric properties in heart failure.  
891 *Circulation Research* **82**, 1206–1223 (1998).
- 892 52. Winslow, R. L., Rice, J., Jafri, S., Marban, E. & O'Rourke, B. Mechanisms of altered excitation-  
893 contraction coupling in canine tachycardia-induced heart failure, II Model studies. *Circulation*  
894 *Research* **84**, 571–586 (1999).
- 895 53. Ramirez, R. J., Nattel, S. & Courtemanche, M. Mathematical analysis of canine atrial action  
896 potentials: rate, regional factors, and electrical remodeling. *American Journal of Physiology-  
897 Heart and Circulatory Physiology* **279**, H1767–H1785 (2000).
- 898 54. Zhang, H. *et al.* Mathematical models of action potentials in the periphery and center of the  
899 rabbit sinoatrial node. *American Journal of Physiology-Heart and Circulatory Physiology* **279**,  
900 H397–H421 (2000).
- 901 55. Clancy, C. & Rudy, Y. Cellular consequences of HERG mutations in the long QT syndrome:  
902 Precursors to sudden cardiac death. *Cardiovascular Research* **50**, 301–313 (2001).
- 903 56. Lu, Y. *et al.* Effects of premature stimulation on HERG K<sup>+</sup> channels. *The Journal of Physi-  
904 ology* **537**, 843–851 (2001).
- 905 57. Fox, J. J., McHarg, J. L. & Gilmour Jr, R. F. Ionic mechanism of electrical alternans. *American  
906 Journal of Physiology-Heart and Circulatory Physiology* **282**, H516–H530 (2002).
- 907 58. Kurata, Y., Hisatome, I., Imanishi, S. & Shibamoto, T. Dynamical description of sinoatrial  
908 node pacemaking: improved mathematical model for primary pacemaker cell. *American Jour-  
909 nal of Physiology-Heart and Circulatory Physiology* **283**, H2074–H2101 (2002).
- 910 59. Oehmen, C., Giles, W. & Demir, S. Mathematical model of the rapidly activating delayed  
911 rectifier potassium current IKr in rabbit sinoatrial node. *Journal of Cardiovascular Electro-  
912 physiology* **13**, 1131–1140 (2002).
- 913 60. Matsuoka, S., Sarai, N., Kuratomi, S., Ono, K. & Noma, A. Role of individual ionic current  
914 systems in ventricular cells hypothesized by a model study. *The Japanese Journal of Physiology*  
915 **53**, 105–123 (2003).
- 916 61. Seemann, G., Sachse, F. B., WEIB, D. L. & DÖSSEL, O. Quantitative reconstruction of car-  
917 diac electromechanics in human myocardium. *Journal of Cardiovascular Electrophysiology* **14**,  
918 S219–S228 (2003).
- 919 62. Hund, T. J. & Rudy, Y. Rate dependence and regulation of action potential and calcium  
920 transient in a canine cardiac ventricular cell model. *Circulation* **110**, 3168–3174 (2004).
- 921 63. Shannon, T., Wang, F., Puglisi, J., Weber, C. & Bers, D. A mathematical treatment of in-  
922 tegrated Ca dynamics within the ventricular myocyte. *Biophysical Journal* **87**, 3351–3371  
923 (2004).
- 924 64. Fink, M., Noble, D., Virag, L., Varro, A. & Giles, W. R. Contributions of HERG K<sup>+</sup> current to  
925 repolarization of the human ventricular action potential. *Progress in Biophysics and Molecular  
926 Biology* **96**, 357–376 (2008).
- 927 65. Aslanidi, O. V., Stewart, P., Boyett, M. R. & Zhang, H. Optimal velocity and safety of dis-  
928 continuous conduction through the heterogeneous Purkinje-ventricular junction. *Biophysical  
929 Journal* **97**, 20–39 (2009).
- 930 66. Inada, S., Hancox, J., Zhang, H. & Boyett, M. One-dimensional mathematical model of the  
931 atrioventricular node including atrio-nodal, nodal, and nodal-his cells. *Biophysical Journal* **97**,  
932 2117–2127 (2009).

- 933 67. Grandi, E., Pasqualini, F. S. & Bers, D. M. A novel computational model of the human  
934 ventricular action potential and Ca transient. *Journal of Molecular and Cellular Cardiology*  
935 **48**, 112–121 (2010).
- 936 68. O’Hara, T., Virág, L., Varró, A. & Rudy, Y. Simulation of the undiseased human cardiac ven-  
937 tricular action potential: model formulation and experimental validation. *PLoS Computational*  
938 *Biology* **7**, e1002061 (2011).
- 939 69. Severi, S., Fantini, M., Charawi, L. A. & DiFrancesco, D. An updated computational model  
940 of rabbit sinoatrial action potential to investigate the mechanisms of heart rate modulation.  
941 *The Journal of Physiology* **590**, 4483–4499 (2012).
